# Supplementary material for: Timing of Tributyrin Supplementation Differentially Modulates Gastrointestinal Inflammation and Gut Microbial Recolonization Following Murine Ileocecal Resection
Source: MDPI journal article supplement (doi:10.3390/nu13062069), 2021-06-17
Supplement: s1 [file s1]

| CTR Group |                                     | Time Point  |             |             |             |            |
|-----------|-------------------------------------|-------------|-------------|-------------|-------------|------------|
|           |                                     | BL          | ICR         | W1          | W2          | W4         |
| Phylum    | <i>Bacteroidetes</i>                | 58.0 (2.2)  | 56.0 (2.0)  | 0.03 (0.03) | 2.7 (2.5)   | 6.9 (6.9)  |
|           | <i>Firmicutes</i>                   | 29.9 (2.7)  | 33.5 (2.6)  | 68.1 (9.7)  | 64.8 (6.3)  | 75.3 (8.7) |
|           | <i>Proteobacteria</i>               | 2.1 (0.3)   | 2.2 (0.2)   | 31.9 (9.7)  | 32.5 (6.6)  | 17.7 (7.6) |
|           | <i>Verrucomicrobiota</i>            | 9.7 (1.3)   | 8.0 (0.8)   | 0 (0)       | 0.02 (0.02) | 0 (0)      |
| Class     | <i>Alphaproteobacteria</i>          | 1.0 (0.2)   | 1.1 (0.2)   | 0 (0)       | 0.01 (0.01) | 0 (0)      |
|           | <i>Bacilli</i>                      | 3.5 (0.7)   | 3.2 (0.8)   | 47.7 (8.9)  | 48.3 (6.1)  | 44.8 (7.1) |
|           | <i>Bacteroidia</i>                  | 58.0 (2.2)  | 56.0 (2.0)  | 0.03 (0.03) | 2.7 (2.6)   | 7.1 (7.1)  |
|           | <i>Clostridia</i>                   | 26.3 (2.7)  | 30.2 (2.2)  | 20.1 (7.1)  | 16.1 (7.7)  | 29.7 (7.0) |
|           | <i>Gammaproteobacteria</i>          | 1.1 (0.1)   | 1.1 (0.1)   | 32.2 (9.7)  | 33.0 (6.6)  | 18.4 (7.8) |
|           | <i>Verrucomicrobiae</i>             | 9.7 (1.3)   | 8.0 (0.8)   | 0 (0)       | 0.02 (0.02) | 0 (0)      |
| Family    | <i>Akkermansiaceae</i>              | 9.9 (1.3)   | 8.1 (0.8)   | 0 (0)       | 0.02 (0.02) | 0 (0)      |
|           | <i>Bacteroidaceae</i>               | 7.5 (0.7)   | 7.1 (0.8)   | 0 (0)       | 0 (0)       | 6.3 (6.3)  |
|           | <i>Clostridiaceae</i>               | 0 (0)       | 0 (0)       | 3.6 (3.6)   | 8.3 (8.3)   | 8.4 (8.4)  |
|           | <i>Enterobacteriaceae</i>           | 0.01 (0.01) | 0 (0)       | 30.6 (9.5)  | 33.0 (6.7)  | 18.1 (7.6) |
|           | <i>Enterococcaceae</i>              | 0 (0)       | 0 (0)       | 4.1 (1.4)   | 8.0 (1.8)   | 9.6 (2.1)  |
|           | <i>Erysipelotrichaceae</i>          | 0.2 (0.1)   | 0.1 (0.04)  | 0.8 (0.6)   | 2.5 (1.8)   | 5.2 (3.3)  |
|           | <i>Lachnospiraceae</i>              | 21.8 (2.2)  | 25.6 (2.3)  | 0.01 (0.01) | 0.3 (0.3)   | 3.6 (2.3)  |
|           | <i>Lactobacillaceae</i>             | 2.5 (0.7)   | 2.3 (0.9)   | 44.0 (8.9)  | 37.7 (5.0)  | 30.7 (5.9) |
|           | <i>Muribaculaceae</i>               | 47.4 (2.1)  | 46.4 (1.8)  | 0.03 (0.03) | 0 (0)       | 0 (0)      |
|           | <i>Oscillospiraceae</i>             | 2.9 (0.6)   | 3.2 (0.3)   | 0 (0)       | 0.3 (0.3)   | 0.2 (0.2)  |
|           | <i>Peptostreptococcaceae</i>        | 0.01 (0.01) | 0.01 (0.01) | 16.5 (7.3)  | 7.1 (2.7)   | 17.1 (3.7) |
|           | <i>Sutterellaceae</i>               | 1.1 (0.1)   | 1.1 (0.1)   | 0 (0)       | 0 (0)       | 0 (0)      |
|           | <i>Tannerellaceae</i>               | 3.9 (0.6)   | 3.1 (0.4)   | 0 (0)       | 2.7 (2.7)   | 0.9 (0.9)  |
| Genus     | <i>[Clostridium] inoculum group</i> | 0.4 (0.2)   | 0.3 (0.1)   | 0 (0)       | 0.6 (0.4)   | 1.7 (0.7)  |
|           | <i>Akkermansia</i>                  | 32.3 (4.0)  | 28.2 (2.4)  | 0 (0)       | 0.02 (0.02) | 0 (0)      |
|           | <i>Anaeroplasma</i>                 | 2.7 (1.0)   | 2.6 (1.1)   | 0 (0)       | 0 (0)       | 0 (0)      |
|           | <i>ASF356</i>                       | 2.0 (0.4)   | 3.0 (0.9)   | 0 (0)       | 0 (0)       | 0 (0)      |
|           | <i>Bacteroides</i>                  | 0 (0)       | 24.9 (2.6)  | 0 (0)       | 0 (0)       | 7.3 (7.3)  |
|           | <i>Clostridium sensu stricto 1</i>  | 0 (0)       | 0 (0)       | 2.9 (2.9)   | 8.2 (8.2)   | 8.3 (8.3)  |
|           | <i>Enterococcus</i>                 | 0 (0)       | 0 (0)       | 5.1 (1.8)   | 9.7 (2.0)   | 13.1 (2.9) |
|           | <i>Escherichia-Shigella</i>         | 0.02 (0.02) | 0 (0)       | 17.9 (6.3)  | 16.6 (5.9)  | 8.6 (4.7)  |

|                                                |            |            |            |            |            |
|------------------------------------------------|------------|------------|------------|------------|------------|
| <i>Lachnospiraceae NK4A136</i><br><i>group</i> | 2.4 (1.0)  | 4.2 (1.5)  | 0 (0)      | 0 (0)      | 0 (0)      |
| <i>Lactobacillus</i>                           | 7.9 (2.4)  | 7.8 (2.7)  | 72.3 (7.8) | 59.3 (8.5) | 53.7 (9.7) |
| <i>Muribaculum</i>                             | 2.8 (1.0)  | 4.1 (1.3)  | 0 (0)      | 0 (0)      | 0 (0)      |
| <i>Parabacteroides</i>                         | 12.3 (1.9) | 10.6 (1.4) | 0 (0)      | 2.9 (2.9)  | 1.0 (1.0)  |
| <i>Parasutterella</i>                          | 3.5 (0.4)  | 3.9 (0.2)  | 0 (0)      | 0 (0)      | 0 (0)      |
| <i>Turicibacter</i>                            | 0 (0)      | 0 (0)      | 1.0 (0.7)  | 2.2 (1.7)  | 6.2 (3.9)  |

**Supplemental Table 1. Shifts in microbial taxa from BL to W4 in CTR mice.** Values reported as median and standard error measurement.

| PRE<br>Group |                                      | Time Point  |             |            |            |            |
|--------------|--------------------------------------|-------------|-------------|------------|------------|------------|
|              |                                      | BL          | ICR         | W1         | W2         | W4         |
| Phylum       | <i>Bacteroidetes</i>                 | 61.2 (0.9)  | 60.8 (2.2)  | 0 (0)      | 0 (0)      | 0 (0)      |
|              | <i>Firmicutes</i>                    | 24.6 (2.0)  | 28.1 (2.0)  | 79.0 (6.9) | 68.3 (7.8) | 73.7 (8.3) |
|              | <i>Proteobacteria</i>                | 3.4 (0.7)   | 3.0 (0.3)   | 20.9 (6.9) | 31.7 (7.8) | 26.3 (8.3) |
|              | <i>Verrucomicrobiota</i>             | 10.4 (1.9)  | 7.8 (1.4)   | 0 (0)      | 0 (0)      | 0 (0)      |
|              |                                      |             |             |            |            |            |
| Class        | <i>Alphaproteobacteria</i>           | 1.9 (0.6)   | 1.5 (0.3)   | 0 (0)      | 0 (0)      | 0 (0)      |
|              | <i>Bacilli</i>                       | 3.3 (1.0)   | 2.4 (0.4)   | 55.8 (6.2) | 58.3 (6.9) | 56.9 (7.6) |
|              | <i>Bacteroidia</i>                   | 61.2 (0.9)  | 60.8 (2.2)  | 0 (0)      | 0 (0)      | 0 (0)      |
|              | <i>Clostridia</i>                    | 21.3 (2.0)  | 25.7 (2.1)  | 23.0 (8.4) | 9.5 (3.1)  | 16.3 (5.4) |
|              | <i>Gammaproteobacteria</i>           | 1.5 (0.1)   | 1.5 (0.2)   | 21.1 (6.9) | 32.3 (7.9) | 26.8 (8.3) |
|              | <i>Verrucomicrobiae</i>              | 10.4 (1.9)  | 7.8 (1.4)   | 0 (0)      | 0 (0)      | 0 (0)      |
| Family       | <i>Akkermansiaceae</i>               | 10.8 (1.9)  | 8.0 (1.4)   | 0 (0)      | 0 (0)      | 0 (0)      |
|              | <i>Bacteroidaceae</i>                | 12.6 (1.8)  | 11.5 (1.3)  | 0 (0)      | 0 (0)      | 0 (0)      |
|              | <i>Clostridiaceae</i>                | 0 (0)       | 0 (0)       | 0 (0)      | 0.1 (0.1)  | 0 (0)      |
|              | <i>Enterobacteriaceae</i>            | 0.1 (0.1)   | 0.02 (0.02) | 21.1 (6.9) | 31.4 (7.7) | 26.4 (8.4) |
|              | <i>Enterococcaceae</i>               | 0 (0)       | 0 (0)       | 1.9 (0.9)  | 4.6 (1.3)  | 7.2 (1.3)  |
|              | <i>Erysipelotrichaceae</i>           | 0.2 (0.1)   | 0.08 (0.03) | 4.1 (3.1)  | 5.7 (3.6)  | 10.4 (5.8) |
|              | <i>Lachnospiraceae</i>               | 17.9 (2.1)  | 21.1 (2.2)  | 0 (0)      | 1.0 (1.0)  | 3.0 (2.0)  |
|              | <i>Lactobacillaceae</i>              | 2.6 (1.0)   | 1.8 (0.4)   | 49.6 (5.8) | 48.8 (8.0) | 40.0 (8.6) |
|              | <i>Muribaculaceae</i>                | 45.2 (1.5)  | 45.4 (2.1)  | 0 (0)      | 0 (0)      | 0 (0)      |
|              | <i>Oscillospiraceae</i>              | 2.0 (0.4)   | 2.9 (0.6)   | 0 (0)      | 0 (0)      | 0.2 (0.2)  |
|              | <i>Peptostreptococcaceae</i>         | 0.04 (0.03) | 0.1 (0.03)  | 22.9 (8.4) | 8.4 (2.8)  | 12.8 (4.4) |
|              | <i>Sutterellaceae</i>                | 1.5 (0.1)   | 1.4 (0.2)   | 0 (0)      | 0 (0)      | 0 (0)      |
|              | <i>Tannerellaceae</i>                | 5.8 (0.9)   | 5.4 (0.2)   | 0 (0)      | 0 (0)      | 0 (0)      |
|              |                                      |             |             |            |            |            |
| Genus        | <i>[Clostridium] inoculum group</i>  | 0.4 (0.1)   | 0.2 (0.1)   | 0 (0)      | 0.8 (0.5)  | 1.7 (0.9)  |
|              | <i>Akkermansia</i>                   | 28.2 (4.4)  | 24.3 (3.6)  | 0 (0)      | 0 (0)      | 0 (0)      |
|              | <i>Anaeroplasma</i>                  | 1.8 (0.8)   | 2.0 (1.1)   | 0 (0)      | 0 (0)      | 0 (0)      |
|              | <i>ASF356</i>                        | 1.4 (0.3)   | 3.5 (0.9)   | 0 (0)      | 0 (0)      | 0 (0)      |
|              | <i>Bacteroides</i>                   | 33.4 (3.2)  | 33.8 (2.4)  | 0 (0)      | 0 (0)      | 0 (0)      |
|              | <i>Clostridium sensu stricto 1</i>   | 0 (0)       | 0 (0)       | 0.1 (0.1)  | 0.1 (0.1)  | 0 (0)      |
|              | <i>Enterococcus</i>                  | 0 (0)       | 0 (0)       | 2.7 (1.1)  | 5.3 (1.1)  | 10.0 (2.9) |
|              | <i>Escherichia-Shigella</i>          | 0.1 (0.1)   | 0 (0)       | 16.6 (5.2) | 12.2 (5.6) | 8.6 (3.6)  |
|              | <i>Lachnospiraceae NK4A136 group</i> | 1.3 (0.7)   | 1.3 (0.7)   | 0 (0)      | 0 (0)      | 0 (0)      |
|              | <i>Lactobacillus</i>                 | 6.9 (2.3)   | 5.1 (0.8)   | 75.8 (6.3) | 75.4 (8.7) | 65.2 (8.8) |
|              |                                      |             |             |            |            |            |

|                        |            |            |           |           |            |
|------------------------|------------|------------|-----------|-----------|------------|
| <i>Muribaculum</i>     | 1.8 (1.0)  | 2.2 (1.1)  | 0 (0)     | 0 (0)     | 0 (0)      |
| <i>Parabacteroides</i> | 15.2 (1.8) | 15.9 (1.8) | 0 (0)     | 0 (0)     | 0 (0)      |
| <i>Parasutterella</i>  | 4.1 (0.3)  | 4.4 (0.5)  | 0 (0)     | 0 (0)     | 0 (0)      |
| <i>Turicibacter</i>    | 0 (0)      | 0 (0)      | 4.3 (3.1) | 6.1 (3.7) | 14.0 (7.1) |

**Supplemental Table 2. Shifts in microbial taxa from BL to W4 in PRE mice.** Values reported as median and standard error measurement.

| POS<br>Group |                                      | Time Point |            |             |            |            |
|--------------|--------------------------------------|------------|------------|-------------|------------|------------|
|              |                                      | BL         | ICR        | W1          | W2         | W4         |
| Phylum       | <i>Bacteroidetes</i>                 | 59.6 (2.2) | 58.5 (3.7) | 0 (0)       | 6.1 (4.9)  | 6.4 (6.4)  |
|              | <i>Firmicutes</i>                    | 24.7 (2.5) | 30.2 (3.9) | 82.9 (6.7)  | 64.7 (8.2) | 64.2 (7.8) |
|              | <i>Proteobacteria</i>                | 3.0 (0.5)  | 2.7 (0.6)  | 17.1 (6.7)  | 29.2 (8.2) | 29.4 (8.1) |
|              | <i>Verrucomicrobiota</i>             | 12.5 (1.8) | 8.1 (1.4)  | 0 (0)       | 0 (0)      | 0 (0)      |
| Class        | <i>Alphaproteobacteria</i>           | 1.6 (0.4)  | 1.6 (0.5)  | 0 (0)       | 0 (0)      | 0 (0)      |
|              | <i>Bacilli</i>                       | 2.6 (0.5)  | 1.7 (0.4)  | 62.7 (6.4)  | 47.4 (6.0) | 46.7 (7.4) |
|              | <i>Bacteroidia</i>                   | 59.4 (2.2) | 58.5 (3.7) | 0 (0)       | 6.3 (5.1)  | 6.5 (6.5)  |
|              | <i>Clostridia</i>                    | 22.1 (2.6) | 28.4 (4.1) | 20.1 (8.5 ) | 16.9 (6.2) | 16.9 (6.5) |
|              | <i>Gammaproteobacteria</i>           | 1.4 (0.3)  | 1.1 (0.1)  | 17.2 (6.6)  | 29.4 (8.2) | 29.9 (8.1) |
|              | <i>Verrucomicrobiae</i>              | 12.5 (1.8) | 8.1 (1.4)  | 0 (0)       | 0 (0)      | 0 (0)      |
| Family       | <i>Akkermansiaceae</i>               | 12.9 (1.9) | 8.3 (1.4)  | 0 (0)       | 0 (0)      | 0 (0)      |
|              | <i>Bacteroidaceae</i>                | 9.7 (1.9)  | 9.4 (1.6)  | 0 (0)       | 6.4 (5.1 ) | 6.7 (6.7)  |
|              | <i>Clostridiaceae</i>                | 0 (0)      | 0 (0)      | 0 (0)       | 0.7 (0.7)  | 0 (0)      |
|              | <i>Enterobacteriaceae</i>            | 0.1 (0)    | 0 (0)      | 14.0 (6.4)  | 16.5 (6.7) | 29.7 (8.1) |
|              | <i>Enterococcaceae</i>               | 0 (0)      | 0 (0)      | 3.9 (1.5)   | 8.2 (0.9)  | 8.9 (3.5)  |
|              | <i>Erysipelotrichaceae</i>           | 0.2 (0.1)  | 0.1 (0)    | 2.8 (2.7)   | 3.2 (1.9)  | 3.8 (1.9)  |
|              | <i>Lachnospiraceae</i>               | 18.5 (2.7) | 24.3 (4.0) | 0 (0)       | 0.5 (0.5)  | 2.3 (1.3)  |
|              | <i>Lactobacillaceae</i>              | 2.1 (0.6)  | 1.4 (0.4)  | 58.5 (7.6)  | 49.4 (8.5) | 34.4 (4.0) |
|              | <i>Muribaculaceae</i>                | 46.8 (1.7) | 46.5 (3.1) | 0 (0)       | 0 (0)      | 0 (0)      |
|              | <i>Oscillospiraceae</i>              | 2.0 (0.4)  | 2.7 (0.6)  | 0 (0)       | 0.1 (0)    | 0 (0)      |
|              | <i>Peptostreptococcaceae</i>         | 0.1 (0)    | 0.1 (0)    | 20.0 (8.5)  | 15.1 (5.6) | 14.1 (6.4) |
|              | <i>Sutterellaceae</i>                | 1.3 (0.2)  | 1.2 (0.1)  | 0 (0)       | 0 (0)      | 0 (0)      |
|              | <i>Tannerellaceae</i>                | 5.2 (0.6)  | 4.4 (0.5)  | 0 (0)       | 0 (0)      | 0 (0)      |
| Genus        | <i>[Clostridium] inoculum group</i>  | 0.3 (0.1)  | 0.2 (0.1)  | 0.2 (0.2)   | 1.8 (1.3)  | 1.6 (0.6)  |
|              | <i>Akkermansia</i>                   | 37.7 (5.0) | 29.4 (4.7) | 0 (0)       | 0 (0)      | 0 (0)      |
|              | <i>Anaeroplasma</i>                  | 1.4 (0.7)  | 0.9 (0.6)  | 0 (0)       | 0 (0)      | 0 (0)      |
|              | <i>ASF356</i>                        | 2.3 (0.7)  | 4.4 (1.3)  | 0 (0)       | 0 (0)      | 0 (0)      |
|              | <i>Bacteroides</i>                   | 27.3 (4.3) | 31.5 (4.1) | 0 (0)       | 11.4 (7.6) | 8.5 (8.5)  |
|              | <i>Clostridium sensu stricto 1</i>   | 0 (0)      | 0 (0)      | 0 (0)       | 1.1 (1.0)  | 0 (0)      |
|              | <i>Enterococcus</i>                  | 0 (0)      | 0.1 (0)    | 4.9 (2.1)   | 9.0 (1.1)  | 11.1 (3.3) |
|              | <i>Escherichia-Shigella</i>          | 0 (0)      | 0 (0)      | 14.4 (6.3)  | 11.6 (5.1) | 14.6 (6.3) |
|              | <i>Lachnospiraceae NK4A136 group</i> | 1.2 (0.6)  | 0.7 (0.5)  | 0 (0)       | 0 (0)      | 0 (0)      |
|              | <i>Lactobacillus</i>                 | 5.6 (1.3)  | 4.8 (1.4)  | 77.0 (7.0)  | 62.4 (8.2) | 60.8 (8.7) |
|              |                                      |            |            |             |            |            |

|                        |            |            |           |           |           |
|------------------------|------------|------------|-----------|-----------|-----------|
| <i>Muribaculum</i>     | 0.7 (0.7)  | 0.7 (0.7)  | 0 (0)     | 0 (0)     | 0 (0)     |
| <i>Parabacteroides</i> | 14.7 (1.3) | 15.3 (1.5) | 0 (0)     | 0 (0)     | 0 (0)     |
| <i>Parasutterella</i>  | 3.5 (0.6)  | 4.1 (0.2)  | 0 (0)     | 0 (0)     | 0 (0)     |
| <i>Turicibacter</i>    | 0 (0)      | 0 (0)      | 2.7 (2.7) | 2.4 (1.9) | 3.3 (1.6) |

**Supplemental Table 3. Shifts in microbial taxa from BL to W4 in POS mice.** Values reported as median and standard error measurement.

| TOT<br>Group | Phylum                               | Time Point |            |             |             |             |
|--------------|--------------------------------------|------------|------------|-------------|-------------|-------------|
|              |                                      | BL         | ICR        | W1          | W2          | W4          |
| Class        | <i>Bacteroidetes</i>                 | 58.8 (2.0) | 59.4 (5.5) | 0 (0)       | 0 (0)       | 18.8 (12.1) |
|              | <i>Firmicutes</i>                    | 27.1 (2.2) | 30.4 (5.9) | 77.4 (6.1)  | 82.1 (7.4)  | 61.0 (11.3) |
|              | <i>Proteobacteria</i>                | 2.7 (0.7)  | 3.1 (0.7)  | 22.6 (6.1)  | 17.9 (7.4)  | 20.2 (7.9)  |
|              | <i>Verrucomicrobiota</i>             | 11.0 (2.5) | 6.1 (0.7)  | 0 (0)       | 0 (0)       | 0 (0)       |
|              | <i>Alphaproteobacteria</i>           | 1.4 (0.6)  | 2.0 (0.6)  | 0 (0)       | 0 (0)       | 0 (0)       |
|              | <i>Bacilli</i>                       | 3.6 (1.3)  | 2.8 (0.8)  | 54.4 (6.9)  | 65.1 (5.9)  | 48.0 (13.4) |
| Family       | <i>Bacteroidia</i>                   | 58.9 (2.0) | 59.5 (5.5) | 0 (0)       | 0 (0)       | 18.9 (12.1) |
|              | <i>Clostridia</i>                    | 23.4 (3.0) | 27.6 (5.6) | 22.6 (10.6) | 16.9 (8.4)  | 12.6 (4.1)  |
|              | <i>Gammaproteobacteria</i>           | 1.3 (0.2)  | 1.2 (0.1)  | 23.0 (6.2)  | 18.0 (7.4)  | 20.4 (8.1)  |
|              | <i>Verrucomicrobiae</i>              | 11.0 (2.6) | 6.1 (0.7)  | 0 (0)       | 0 (0)       | 0 (0)       |
|              | <i>Akkermansiaceae</i>               | 11.4 (2.6) | 6.4 (0.8)  | 0 (0)       | 0 (0)       | 0 (0)       |
|              | <i>Bacteroidaceae</i>                | 15.0 (3.1) | 13.1 (4.1) | 0 (0)       | 0 (0)       | 9.3 (9.3)   |
|              | <i>Clostridiaceae</i>                | 0 (0)      | 0 (0)      | 0 (0)       | 0 (0)       | 0 (0)       |
|              | <i>Enterobacteriaceae</i>            | 0 (0)      | 0 (0)      | 22.4 (5.9)  | 18.0 (7.5)  | 20.1 (8.0)  |
|              | <i>Enterococcaceae</i>               | 0 (0)      | 0 (0)      | 0 (0.0)     | 9.4 (6.2)   | 3.1 (1.0)   |
|              | <i>Erysipelotrichaceae</i>           | 0.1 (0.1)  | 0 (0)      | 0 (0)       | 0.2 (0.2)   | 0.4 (0.3)   |
|              | <i>Lachnospiraceae</i>               | 19.5 (3.5) | 22.9 (4.7) | 0 (0)       | 0 (0)       | 5.1 (2.7)   |
|              | <i>Lactobacillaceae</i>              | 2.5 (1.0)  | 1.3 (0.4)  | 53.4 (6.9)  | 56.0 (10.0) | 44.6 (13.1) |
|              | <i>Muribaculaceae</i>                | 40.0 (3.3) | 42.4 (2.1) | 0 (0)       | 0 (0)       | 0 (0)       |
|              | <i>Oscillospiraceae</i>              | 1.7 (0.5)  | 2.6 (1.0)  | 0 (0)       | 0 (0)       | 0.2 (0.2)   |
| Genus        | <i>Peptostreptococcaceae</i>         | 0.1 (0.1)  | 0 (0)      | 22.6 (10.6) | 16.5 (8.1)  | 7.1 (2.8)   |
|              | <i>Sutterellaceae</i>                | 1.4 (0.2)  | 1.2 (0.1)  | 0 (0)       | 0 (0)       | 0 (0)       |
|              | <i>Tannerellaceae</i>                | 5.4 (1.4)  | 5.4 (1.5)  | 0 (0)       | 0 (0)       | 10.0 (8.2)  |
|              | <i>[Clostridium] inoculum group</i>  | 0.2 (0.1)  | 0.3 (0.1)  | 0 (0)       | 0.3 (0.3)   | 0.5 (0.3)   |
|              | <i>Akkermansia</i>                   | 28.0 (7.0) | 19.0 (3.1) | 0 (0)       | 0 (0)       | 0 (0)       |
|              | <i>Anaeroplasma</i>                  | 2.4 (0.8)  | 3.9 (1.2)  | 0 (0)       | 0 (0)       | 0 (0)       |
|              | <i>ASF356</i>                        | 2.4 (0.9)  | 2.6 (1.1)  | 0 (0)       | 0 (0)       | 0 (0)       |
|              | <i>Bacteroides</i>                   | 35.8 (7.1) | 34.2 (7.7) | 0 (0)       | 0 (0)       | 12.8 (12.8) |
|              | <i>Clostridium sensu stricto 1</i>   | 0 (0)      | 0 (0)      | 0 (0)       | 0 (0)       | 0 (0)       |
|              | <i>Enterococcus</i>                  | 0 (0)      | 0 (0)      | 1.6 (1.2)   | 14.5 (11.0) | 3.1 (0.8)   |
|              | <i>Escherichia-Shigella</i>          | 0 (0)      | 0 (0)      | 16.7 (8.4)  | 11.2 (5.7)  | 8.4 (5.8)   |
|              | <i>Lachnospiraceae NK4A136 group</i> | 1.9 (1.1)  | 3.8 (1.8)  | 0 (0)       | 0 (0)       | 0 (0)       |
|              | <i>Lactobacillus</i>                 | 5.7 (2.2)  | 4.0 (1.4)  | 81.1 (9.0)  | 74.0 (10.9) | 61.2 (16.0) |

|                        |            |            |       |       |            |
|------------------------|------------|------------|-------|-------|------------|
| <i>Muribaculum</i>     | 1.6 (1.1)  | 2.8 (1.8)  | 0 (0) | 0 (0) | 0 (0)      |
| <i>Parabacteroides</i> | 12.5 (3.3) | 14.1 (2.7) | 0 (0) | 0 (0) | 11.8 (9.3) |
| <i>Parasutterella</i>  | 3.2 (0.3)  | 3.6 (0.3)  | 0 (0) | 0 (0) | 0 (0)      |
| <i>Turicibacter</i>    | 0 (0)      | 0 (0)      | 0 (0) | 0 (0) | 0 (0)      |

**Supplemental Table 4. Shifts in microbial taxa from BL to W4 in TOT mice.** Values reported as median and standard error measurement.



**a CTR vs PRE**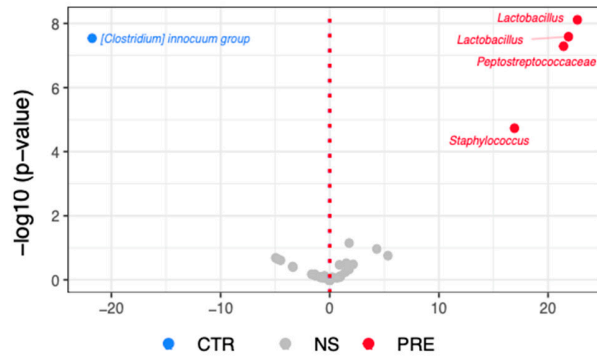**b CTR vs POS**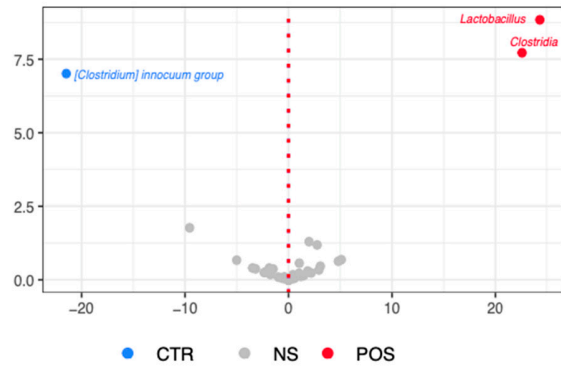**c CTR vs TOT**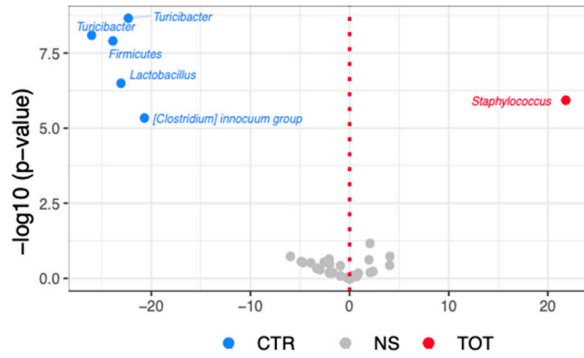**d PRE vs POS**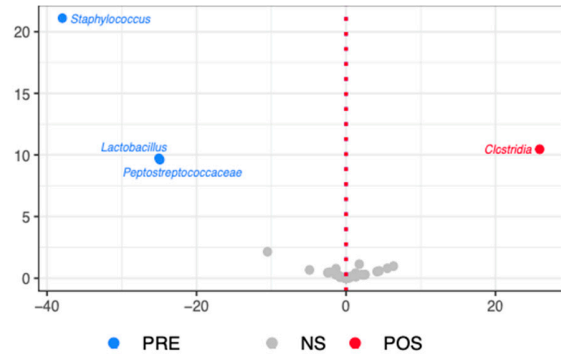**e PRE vs TOT**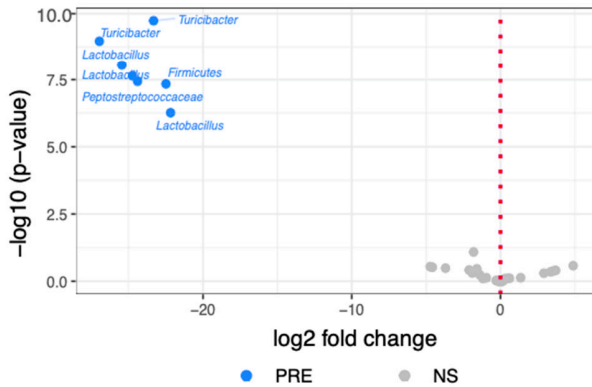**f POS vs TOT**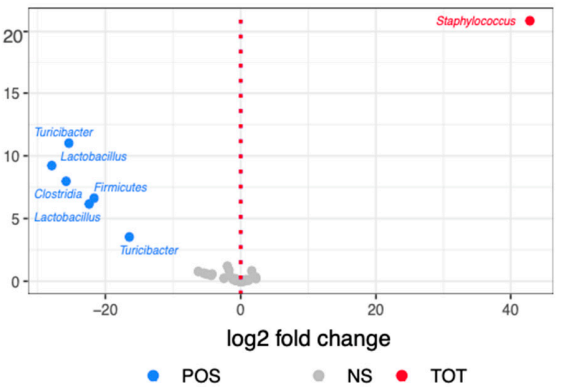

**Supplemental Figure 1. Volcano plots demonstrating differences in relative abundance between groups at W4 using DESeq2 analysis. a. CTR vs. PRE. b. CTR vs. POS. c. CTR vs. TOT. d. PRE vs. TOT e. PRE vs TOT f. POS vs. TOT.**

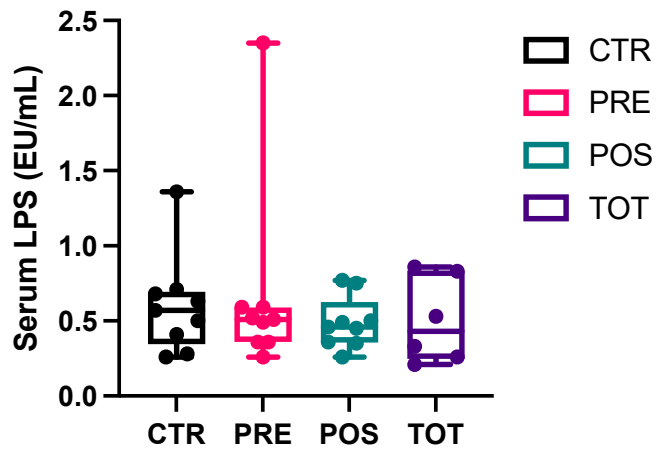

**Supplemental Figure 2.** Differences in serum LPS between groups at W4. Box-and-whisker plots represent the distribution of each group at W4. The median is represented by the middle line while the upper and lower borders of the box plot identify the 75<sup>th</sup> and 25<sup>th</sup> percentile, respectively. The whiskers correspond to the maximal and minimal values.

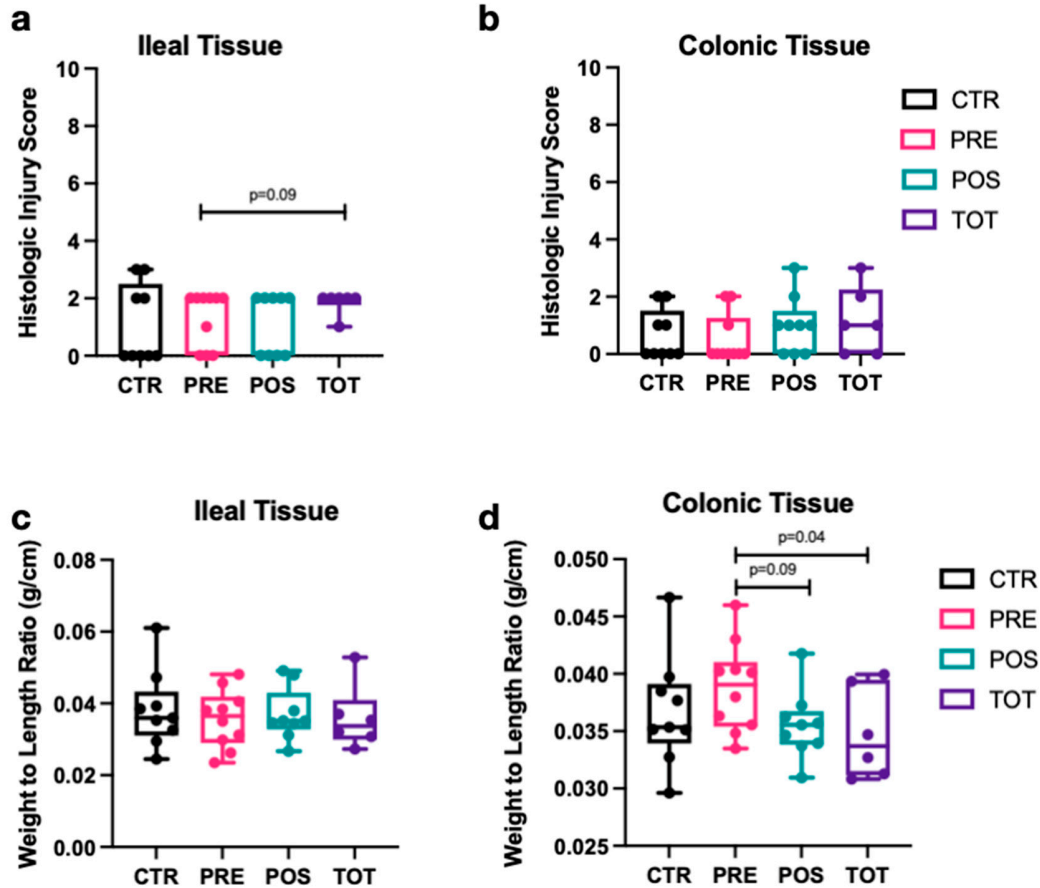

**Supplemental Figure 3. Perianastomotic ileal and colonic tissue histologic injury scoring and weight to length ratios.** Box-and-whisker plots represent the distribution of each group at week 4. The median is represented by the middle line while the upper and lower borders of the box plot identify the 75<sup>th</sup> and 25<sup>th</sup> percentile, respectively. The whiskers correspond to the maximal and minimal values. **a-b.** Histologic injury scoring for ileal and colonic tissues, respectively. **c-d.** Weight to length ratio for ileal and colonic tissue, respectively.
